**Regional differences in the abiotic environment contribute to genomic divergence within a wild tomato species**

Running title: Landscape genomics of a wild tomato

Matthew J.S. Gibson<sup>1</sup> & Leonie C. Moyle<sup>1</sup>

<sup>1</sup>Department of Biology, Indiana University, Bloomington, Indiana, USA

Corresponding author: Matthew J.S. Gibson ([gibsomat@indiana.edu](mailto:gibsomat@indiana.edu))

# ABSTRACT

The wild currant tomato *Solanum pimpinellifolium* inhabits a wide range of abiotic habitats across its native range of Ecuador and Peru. Although it has served as a key genetic resource for the improvement of domestic cultivars, little is known about the genetic basis of traits underlying local adaptation in this species, nor what abiotic variables are most important for driving differentiation. Here we use redundancy analysis (RDA) and other multivariate statistical methods (structural equation modeling (SEM) and generalized dissimilarity modeling (GDM)) to quantify the relationship of genomic variation (44,064 single nucleotide polymorphisms) with climate and geography, among 140 wild accessions. RDA, SEM, and GDM each identified environment as explaining more genomic variation than geography, suggesting that local adaptation to heterogeneous abiotic habitats may be an important source of genetic diversity in this species. Environmental factors describing temporal variation in precipitation and evaporative demand explained the most SNP variation among accessions, indicating that these forces may represent key selective agents. Lastly, by studying how SNP-environment associations vary throughout the genome, we mapped the location and investigated the functions of loci putatively contributing to climatic adaptations. Together our findings indicate an important role for selection imposed by the abiotic environment in driving genomic differentiation between populations.

**KEYWORDS:** adaptation, eigenanalysis, redundancy analysis, population structure, landscape genetics

## INTRODUCTION

Local adaptation is thought to underlie a large proportion of phenotypic variation segregating within species. Despite this, the primary environmental agents driving selection between natural populations are still unknown in most systems. Across landscapes, genetic divergence can result from selection imposed by environmental forces, but also from the effects of restricted gene flow and genetic drift when subpopulations are partially isolated (Wright, 1943). Disentangling the concurrent effects of spatial isolation and natural selection on generating genetic diversity is critical for understanding the relative importance of adaptation in driving diversification, as well as for identifying the environmental factors underlying its occurrence. This remains a major technical challenge, mainly because collinearity is common among spatial and environmental variables (Kissoudis et al., 2016; Lasky et al., 2012; Lee & Mitchell-Olds, 2011; Wiens, 1989). New statistical methods and the increasing availability of fine-scale environmental and genomic data provide one approach to estimate the independent contributions of environment and space to explaining patterns of genetic variation. These strategies can complement traditional tests for local adaptation (i.e., reciprocal transplants) and begin to characterize the nature of selection acting in the wild, as well as its genetic targets (Fournier-Level et al., 2011; Hancock et al., 2011; Lasky et al., 2012, 2015).

*Solanum pimpinellifolium* L. (currant tomato) is one of the closest wild relatives of domesticated tomato (*Solanum lycopersicum* L.) and has historically served as a key resource for the identification and breeding of agronomically-important traits (Pedley & Martin, 2003; Pitblado & Kerr, 1979; Tanksley, 2004; Tanksley et al., 1996). Several accessions are known to be tolerant to acute abiotic stressors such as salinity or drought (Bolarin et al., 1991; Cuartero et al., 1992; Kissoudis et al., 2016; Foolad & Yin, 1997; Razali et al., 2018), however there is

limited data on the nature of genetic and phenotypic variation segregating within this species (Foolad, 2007), especially as it relates to potential climatic adaptations. *S. pimpinellifolium* occupies a large geographic range from Ecuador to southern Peru (**Figure 1**); populations experience cool mid-elevation habitats in the Andes as well as dry, hot habitats along the pacific coast. Both the abiotic environment (climate and soil characteristics; **Figure 1**) and ecologically relevant traits vary considerably throughout the range (Chitwood et al., 2012a, 2012b; Nakazato et al., 2008; Nakazato et al., 2010; Rick et al., 1977; Zuriaga et al., 2009), and previous studies have suggested that a large fraction of this phenotypic variation could be attributable to spatially varying selection imposed by the abiotic environment (Zuriaga et al., 2009; Blanca et al., 2012, 2015). For example, using common garden experiments Nakazato et al. (2008) identified significant intraspecific variation for drought tolerance between accessions from coastal and highland regions. Using Mantel tests, Blanca et al. (2015) showed that major patterns of genetic structure among *S. pimpinellifolium* accessions correspond strongly with broad patterns of bioclimatic variation (also see Zuriaga et al., 2009 & Blanca et al., 2012). In addition to these intraspecific patterns, between species, distribution models have further suggested that local climatic variation (especially in temperature and water availability), rather than geographic isolation, is the main factor explaining contemporary distributions (Nakazato et al., 2010). Whether this pattern holds for variation within species, as well as the identity of the key environmental/selective gradients responsible, has not yet been thoroughly assessed in a genomic context. Nonetheless, describing the factors shaping intraspecific genetic variation is essential for uncovering the processes that initiate phenotypic divergence, including the relative role of local adaptation in driving diversification.

79           The main goals of this study were to characterize the environmental forces that might  
80   impose selection on ecologically relevant traits across the range of *S. pimpinellifolium*, and to  
81   determine the degree to which these environmental factors explain genetic variation independent  
82   of demographic history. In the absence of confounding population structure, associations  
83   between allele frequencies and environmental variables are considered evidence for local  
84   adaptation (Endler, 1986). These associations can be used to identify both the forces responsible  
85   for imposing selection, as well as the specific loci involved in adaptive evolutionary responses.  
86   However, since both adaptation and spatially structured gene flow can result in correlations  
87   between allele frequencies and the environment (Endler, 1977), demographic history can cloud  
88   such inferences of local adaptation. Moreover, abiotic selection is often the result of a  
89   combination of many partially colinear variables, making simple gene-environment correlations  
90   incomplete and potentially misleading. To address these issues, multivariate statistical methods  
91   commonly used in community ecology—in particular the multivariate regression technique  
92   “redundancy analysis” (RDA; Legendre & Legendre, 1998) and other constrained ordination  
93   procedures—have recently been applied to landscape genomics to study how climatic variation  
94   affects spatial patterns of genomic variation (Lasky et al., 2012, 2016; Forester et al., 2018;  
95   Wang et al., 2013). These methods have been used to identify both the sources of selection  
96   imposed by the multivariate environment and their genetic targets (individual loci) (Forrester et  
97   al., 2018; Lasky et al., 2012, 2016; Lee & Mitchell-Olds, 2011; Manel et al., 2010; Salathe &  
98   Schmid-Hempel, 2011; Sork et al., 2010). In doing so, they have begun to address the challenges  
99   of disentangling geographical structure from environmental variation in order to quantify the  
100   independent contribution of environmental forces to shaping genomic variation across space.

Here we employ RDA to study the relationship between environmental and SNP data matrices while modeling population structure as a covariate, in order to estimate the relative influence of abiotic adaptation on genomic variation across the native range of *S. pimpinellifolium*. Specifically, we use RDA to 1) estimate the independent quantitative contributions of climate, space, and their colinear portion to explaining patterns of genome-wide SNP variation; 2) characterize the specific abiotic variables with the largest influence on genetic variation; and 3) identify genomic regions showing strong associations with major axes of multivariate climate and investigate their potential functional roles in mediating local adaptation. We complement these RDA analyses with other methods designed to quantify the roles of selection and spatial isolation. Our analyses reveal that models including several key abiotic variables explain more genomic variation among genotypes than models considering only geographic isolation. They also allow us to identify loci that have significant associations with environmental variation, after incorporating population structure via partial regression. These results suggest a prominent role for local adaptation in driving genetic divergence among populations of this agronomically important crop wild relative.

## METHODS

*Plant material and genotyping.* Seeds from 140 wild georeferenced *S. pimpinellifolium* accessions (**Figure 1; Table S1**) spanning the entire species range were obtained from the Charles M. Rick Tomato Genetic Resource Center (TGRC; Davis, Calif.). Seeds were soaked in a 50% bleach solution (as per the TGRC protocol), germinated, and transplanted into 1-gallon pots at the Indiana University greenhouses. Fresh leaf material was collected from one plant per accession at 30 days post-germination. DNA was extracted using DNeasy Plant Mini Kits

(Qiagen, Valencia, Calif, USA) and two double-digest restriction site associated sequencing (ddRAD) libraries were prepared using *PstI* and *EcoRI* enzymes by the Indiana University Center for Genomics and Bioinformatics. These enzymes were selected to enrich for cut sites in coding regions based on an *in silico* digestion of the *S. lycopersicum* reference genome ver. SL3.0 (Tomato Genome Consortium, 2012). Libraries were sequenced across two Illumina NextSeq flowcells (150 bp, paired-end, high-output). Raw reads were filtered for quality, trimmed of Illumina adapter sequences using *fastp* (Chen et al., 2018), and then demultiplexed by individual using the `process_radtags` program in *Stacks* (ver. 2; Catchen et al., 2013). After demultiplexing, reads were mapped to the *S. lycopersicum* reference genome version SL3.0 using BWA (Li & Durbin, 2009). Variants were called using the *Stacks* `ref_map` pipeline. Only bi-allelic SNPs typed in at least 30 percent of individuals were retained. Further filtering was applied prior to running specific analyses (see below).

*Environmental data.* For each accession, data were compiled for 54 abiotic environmental parameters available from public databases. 19 bioclimatic variables as well as monthly solar radiation, vapor pressure, and wind speed data were obtained directly from the WorldClim2 database (Fick & Hijmans, 2017). Additional transformations of the WorldClim data were obtained from the Climate South America (ClimateSA v1.0; Hamann et al., 2013) database. Global aridity measures were obtained from the Consultative Group on International Agricultural Research (CGIAR; Zomer et al., 2008). Lastly, soil pH, type, density (fine earth fraction), and water capacity at a depth of 5cm were obtained from the SoilGrids initiative (<http://soilgrids.org>). All variables were centered, scaled, and tested for normality using Shapiro-Wilks tests. If appropriate, variables were log-transformed. One-hot encoding was used for all

factor variables prior to running RDA. The full list of all 54 climate and soil variables can be found in **Table S2**.

*Spatial data.* We represented spatial (non-genetic) structure in RDA using distance-based Moran Eigenvector Maps (dbMEMs; formally referred to as principle components of neighborhood matrices or PCNMs). Briefly, dbMEMs—much like principle components in a PCA—represent structure in a dataset with orthogonal axes. dbMEMs describe complex patterns of spatial structure in rectangular form suitable for use as a co-factor in downstream statistical analyses such as RDA (Borcard et al., 2018). Importantly, they are able to model both broad- and fine-scale patterns (Borcard et al., 2018; see **Figure S1**), both of which may affect the partitioning of genetic variation across large and highly heterogeneous landscapes. dbMEMs were calculated using the quickMEM function included in Borcard et al. (2018). This function uses forward selection and permutation tests to identify the appropriate number of axes needed to explain patterns of spatial genetic variation, without overfitting.

*Population genetic structure.* Both model-based (*fastStructure*; Raj et al., 2014) and non-model based (PCA) methods were used to quantify genetic structure in the data. Markers in high linkage disequilibrium ( $r^2 > 0.9$ ) were pruned from the dataset prior to running PCA and *fastStructure*, using *bcftools* (Li et al., 2011). PCA was implemented in the R (R Core Team, 2019) package *adeigenet* (Jombart & Ahmed, 2011). Prior to running PCA, missing calls were imputed as the mean numeric value for each marker, to speed up computation. Model complexity in *fastStructure* was determined by minimizing the marginal likelihood of the data over values of



K from one to ten. Clusters in the data were also identified using the K-means algorithm for all PCs by minimizing the Bayesian information criterion (BIC) across values of K from one to 100.

*Partitioning total SNP variation.* To evaluate the relative contribution of demographic history and the abiotic environment to explaining patterns of spatial genetic variation, the amount of genome-wide SNP diversity attributable to environment and geography was estimated using three methods: variance partitioning by redundancy analysis (RDA), generalized dissimilarity modeling (GDM), and structural equation modeling (SEM). RDA is a form of constrained ordination first applied in community ecology that allows one to assess the explanatory power of multivariate predictors (in this case, environmental and geographic variables) for multivariate responses (genotypes; van den Wollenberg, 1977; Legendre & Legendre, 1998). RDA identifies linear combinations of explanatory variables (canonical axes) that best explain linear combinations of response variables. As with other forms of eigenanalysis, these canonical axes are orthogonal to each other. Here, these axes represent correlated SNPs that are also correlated with environment. Using multiple partially constrained models, it is possible to partition total genetic variation into that explained independently by climate, space, and their colinear portion (Borcard et al., 2018). All RDA analyses were performed using the R package *vegan* (Oksanen, 2018) and significance was assessed using 1,000 permutations of the genotype matrix. Since RDA requires no missing data, only markers containing no missing calls were included (6,830 SNPs, compared to 44,064 in the total dataset). Distances between collection sites were represented using dbMEMs (described above). Because collinearity among environmental predictors can lead to inflation of variance components in RDA (Borcard et al., 2018), we

performed forward variable selection using the `forward.sel` function in the R package *adespatial* to identify predictive and non-redundant environmental variables for partitioning.

In addition to RDA, structural equation modeling (SEM) was performed using the R package *lavaan* (Rosseel, 2012). SEM is a statistical framework similar to path analysis that has been applied to estimating the relative contributions of isolation-by-environment (IBE) and isolation-by-distance (IBD) to explaining spatial genetic variation (Wang et al., 2013). While powerful, this method is not able to estimate the independent contribution of the colinear portion of environment and space on explaining SNP variation, unlike RDA. For SEM, geographic distance was represented using Euclidean distance between accessions. All 54 environmental variables were used to infer the latent environmental distance term (SEM accommodates correlated inputs; Wang et al., 2013). SEM was performed using the same set of markers as used for variance partitioning in RDA.

Lastly, generalized dissimilarity modeling (GDM; Ferrier et al., 2007) was applied to the SNP data. GDM is similar in principle to RDA and SEM but relies on different statistical methods. GDM uses nonlinear matrix regression to accommodate nonlinear statistical relationships that are often observed in ecological datasets; in contrast, RDA and SEM—as implemented here—do not model nonlinear relationships. GDM analyses were performed in R using the *gdm* package (Manion et al., 2018).

*Importance of specific climate variables.* Forward variable selection with RDA was used to infer which specific environmental variables may be most important for generating selective differences across the range of *S. pimpinellifolium*. We performed this procedure with the `forward.sel` function in *adespatial*, using 10,000 permutations to assess significance at each

iteration and with RDA models both including and not including spatial structure as a covariate. The relative contribution of each individual variable to the constrained model was calculated as a weighted sum of correlation coefficients across the first four RDA axes. The contribution of each variable to the full RDA model was then calculated as the ratio of this value and total genetic variance (Lasky et al., 2012).

*Identifying outlier loci.* RDA was also used to identify outlier loci showing especially strong relationships with multivariate environmental axes. The ability of RDA to identify loci responding to combinations of environmental predictors, instead of testing and treating each variable independently, is an advantage of RDA outlier analysis over classical mixed-model association methods. Moreover, because it simultaneously evaluates combinations of SNPs, RDA may also be better able to identify more subtle patterns environmental association involving multiple minimally diverged loci (Forester et al., 2018)—suggestive of polygenic adaptation—that can be obscured by traditional approaches. Here, outliers were defined as the SNPs having loadings along the first RDA axis  $\pm 4$  SDs from the mean for that axis (Forester et al., 2018; Lasky et al., 2012). To reduce the potential for spurious associations due to shared ancestry, a partial RDA conditioned on dbMEMs was implemented. Instead of using the reduced set of markers with no missing calls for this analysis, we imputed SNPs at the markers with missing data in the full dataset based on the mean allelic value at each site, and used this full dataset for outlier identification. Top candidate SNPs were investigated for their proximity to known gene models, using the ITAG 3.2 tomato genome annotation (Tomato Genome Consortium, 2012).

## RESULTS

### *Genotype coverage and distribution*

Our ddRAD pipeline identified 359,796 SNPs segregating within *S. pimpinellifolium*. After stringent filtering for depth and missing data, this set of SNPs was reduced to 44,064. One variant occurred roughly every 18 kb. SNPs were enriched (75.6%) for sites in or nearby (within 5 kb) annotated gene models (9.4% within exons), suggesting that our enrichment based on *in silico* digestion was successful (determined by SnpEff; Cingolani et al., 2012). Of annotated SNPs in coding regions, 60.9% resulted in changes to amino acid composition (i.e., were non-synonymous).

### *Population structure follows a latitudinal gradient and defines regional genetic clusters*

The first two axes of the multi-locus PCA based on 17,358 SNPs (LD pruned) explained 15.8% and 6.24% of genetic variation, respectively. Minimizing BIC in K-means clustering identified five clusters in the data (**Figure 2**), which followed a latitudinal gradient and roughly corresponded to variation along the first principal component axis. The model-based analysis conducted in *fastStructure* identified four groups in the data; these groups largely corresponded to the clusters identified using K-means, except that clusters four and five were not separated and instead were identified as a single group (**Figure 2**). These patterns agree with other recent genomic analyses of population structure in this species (Lin et al., 2019). Varying degrees of admixture were inferred. The most heterogeneous individuals were found at the center of the species range (cluster 1, light blue in **Figure 2**), an observation which agrees with previous marker analyses in this species (Lin et al., 2019; Rick et al., 1977; Zuriaga et al., 2009) and which matches general expectations for patterns of genetic diversity across species ranges

(Vucetich & Waite, 2003). Similarly, heterozygosity increased towards the equator (**Figure S2**), also in general agreement with previous findings (Rick et al., 1977; Zuriaga et al., 2009; Lin et al., 2019).

# *RDA identifies climate and spatial variables that predict SNP variation*

*Spatial variables.* Forward selection of the dbMEM variables identified 10 axes as sufficient to explain geographic structure among accessions. Four of these axes described broad patterns of latitudinal structure (dbMEM1, 2, 3, and 4) and the remaining six described fine-scale patterns (dbMEM6, 7, 8, 9, 11 and 17; **Figure S1**). The axes describing fine-scale spatial structure cumulatively explained the most SNP variation among accessions (7.01%; **Table 1**). Broad-scale spatial variables explained a total of 5.42% of SNP variation (**Table 1**). dbMEM2 explained the most variation of any single variable (1.74%).

*Climate variables.* When analyzed without accounting for spatial structure using partially constrained ordination, we identified 14 abiotic variables as significantly predictive of genetic variation among accessions (**Table 2**). The most predictive variable was degree days above 18C, however several variables contributed nearly equally to the RDA model. These include annual maximum solar radiation, average annual wind speed, isothermality (a measure of temperature variability), annual maximum wind speed, and variation in vapor pressure. In contrast, forward selection constrained on dbMEM spatial axes identified 6 environmental variables as predictive of genetic variation (**Table 2**); these variables represent gradients predictive of genetic variation after accounting for the proportion explained by geographic distance. Importantly, these will not include environmental gradients that are entirely colinear with space—including some that may

contribute to clinal adaptation—and thus represent a conservative subset of the variables potentially contributing to geographical variation in selection. The contribution of these 6 gradients in RDA space is shown in **Figure 3**. The strongest predictor was the coefficient of monthly variation in vapor pressure, followed by precipitation seasonality, soil texture, annual maximum solar radiation, maximum potential evapotranspiration, and minimum potential evapotranspiration (**Table 2**).

The correlations of these six variables with the first two RDA axes (loadings in **Figure 3**) suggests that the contribution of each variable to SNP variation differs geographically across the species range. To test for the presence of regional climatic differences that may contribute to divergent selection, we studied how each environmental predictor varied by genetic cluster (**Figure S3**). Significant differences among genetic clusters were identified for all 6 predictors based on ANOVA tests ( $P < 1 \times 10^{-8}$  for all tests), suggesting that each regional cluster occupies a more or less unique abiotic habitat. This finding is recapitulated when breaking down all 58 environmental variables into orthogonal components (**Figure S4**); the first two components of climatic variation separate accessions by region.

### *Regional climatic differences explain more SNP variation than geography*

*Variance partitioning by RDA.* Using RDA, the abiotic environment (14 variables identified through forward selection) and spatial structure (10 dbMEMs identified through forward selection) explained 22% of SNP variation among accessions. The majority of this (17%) was attributable to the colinear portion of environment + space (**Figure 4**). This fraction could represent either the contribution of clinal environmental factors or latent spatial population structure that is not captured by the dbMEMs. Considering the independent effects of

environment and space, the environment alone explained more SNP variation (3%) than space alone (2%; **Figure 4**). The observed proportions of variation explained by climate and space were greater than the proportions explained in all of 1000 permuted data sets ( $P < 0.001$ ).

*Structural equation modeling (SEM)*. Regression components of environmental distance and geographic distance on genetic distance identified using SEM were 0.788 (SE = 0.044) and 0.174 (SE = 0.012), respectively (**Table S4**). This corresponds to 7% (6.4% - 7.7%) and 3% (2.6% - 3.5%) of total genetic variance being attributable to environmental distance and geographic distance between accessions, respectively, which is consistent with our findings from RDA (**Figure 4**). Only the environmental regression component was higher than those obtained from all of 1000 permuted data sets ( $P < 0.001$ ). As with RDA, this suggests that environmental differences between accessions are shaping the distribution of genetic variation to a larger degree than spatial isolation.

*Generalized dissimilarity modeling (GDM)*. The percent deviance in genetic variation among accessions explained by the full (environment + space) GDM model was 30.2% (**Figure 4**; see **Table S5** for full model fit). 29.2% and 23.9% of deviance was explained by models considering only environmental and geographic effects on genetic variation between accessions, respectively (**Figure 4**). All of these models were significant ( $P < 0.001$ ) based on permutation tests. These results agree with RDA and SEM; a larger fraction of SNP variation is attributable to environmental variation than to spatial isolation.

*RDA identifies outlier loci associated with multivariate climate*

We observed significant variation among SNPs in the degree to which they were associated with the abiotic environment, as measured by their loadings along the first RDA axis (**Figure 5**). We identified candidate loci for local adaptation by examining SNPs displaying loadings along the first RDA axis  $\pm$  4 standard deviations from the mean (Forester et al., 2018; Lasky et al., 2012). This identified 252 SNPs showing particularly strong associations with multivariate climate. In the model containing spatial structure as a covariate, the strongest signal of association spanned 23.5 Mbp on chromosome four (**Figure 5**). This region contained 333 annotated genes. The top associated SNP in this region was 30 bp upstream of a 60S ribosomal subunit gene (**Table 3**). Other significant associations in this region include intergenic substitutions proximal to DNA glycosylase, exocyst complex component 7, and cellulose synthase; a non-synonymous substitution in MYB transcription factor 73; and intronic substitutions in sterol glucosyltransferase 4 (SGT4), nuclease S1, BY-2 kinesin protein 5, RNA helicase DEAH-Box 13, and translation initiation factor 3, among others (**Table 3**; **Table S8**).



## DISCUSSION

Local adaptation to the abiotic environment is often thought to play a major role in diversification both within and between species, however its contribution relative to other evolutionary forces is rarely quantified. In this study, we investigated the relationship of 44,064 SNPs with fine-scale climatic and spatial data among 140 accessions of the ecologically diverse crop wild relative *S. pimpinellifolium*. We found that the abiotic environment—as described by climate and soil characteristics—explained more SNP variation than spatial structure (**Figure 4**), demonstrating that our evaluated environmental factors are more influential in shaping the geographic distributions of SNPs in this species, compared to spatial isolation. Both GDM and SEM—two methods which have also been applied to quantifying the contributions of space and environment to patterns of genetic variation—agree with our RDA results. From this we conclude that ecological differences among populations are closely associated with the maintenance of contemporary genetic variation across space and that local adaptation is likely a major driver of these patterns.

Our RDA analysis identified that a large (17%) portion of SNP variation among accessions was explainable by the colinear fraction of environment and space (**Figure 4**). This fraction could represent the contribution of clinal environmental forces that are highly correlated with space (e.g., latitudinal gradients in temperature). Clinal gradients are considered to be important drivers of adaptive evolution in many species (Adrion et al., 2015; Kooyers et al., 2015), and across the range of *S. pimpinellifolium*, many environmental variables show strong geographic trends and are correlated with both genetic (i.e., PCs) and spatial (i.e., dbMEMs) structure (**Table S8**). Previous studies in *S. pimpinellifolium* have demonstrated strong correlations between environmental and genetic distances among accessions of this species,

largely associated with latitudinal gradients (Blanca et al., 2015; Zuriaga et al., 2009). Accordingly, when we did not correct for spatial structure with constrained ordination, a highly clinal variable—degree days above 18C—explained the most total SNP variation (**Table 2**). Although geographic clines have historically been considered important for understanding the genetics of adaptation (Adrion et al., 2015; Endler, 1977, 1986), disentangling geographically structured variation from adaptive variation remains a major challenge—as evidenced here—and will likely require novel statistical methods to address. In *S. pimpinellifolium*, further population sampling across clinal gradients coupled with *in situ* common garden experiments could be one way of disentangling the independent effects of space and climate in these cases.

Despite the substantial collinearity we observed between space and environment, our analysis discerned several axes of spatial variation that uniquely explained SNP variation. The second spatial dbMEM variable explained the largest portion of SNP variation among accessions (**Table 1**). This variable describes broad patterns of spatial structure and separates accessions from the center of the range (northern Peru) from those at the northern and southern extremes (**Figure S1**). This finding is consistent with our genetic analysis of population structure—as well as previous spatial genetic data (Rick et al., 1977; Zuriaga et al., 2009; Lin et al., 2019)—which demonstrate a strong latitudinal pattern of genetic relatedness. Interestingly, while the second dbMEM axis explained the most variance of any single spatial variable, cumulatively more variance was explained by fine-scale dbMEM axes (dbMEM5, 6, 7, 8, 9, & 17; cumulative  $R^2 = 0.0701$ ). Such a pattern may be driven by the geographic landscape of the Andes; large and patchy altitudinal clines (sea level to > 6500 m) may limit local dispersal between adjacent populations, amplifying genetic differentiation over small spatial scales.

Apart from spatial variation associated with SNPs, our analysis also identified specific environmental factors that uniquely explained additional SNP variation. Temporal fluctuations in precipitation (seasonality) and vapor pressure (the coefficient of monthly variation) explained the most genome-wide SNP variation when we simultaneously considered the effects of spatial structure in our RDA analysis (**Table 2**). This reinforces some previous empirical findings—especially the role of precipitation seasonality as a key factor—but also points to additional environmental forces as potential abiotic selective agents in this species. Precipitation was previously implicated in driving ecological adaptation in both this and other tomato species (Nakazato et al., 2008, 2010). Specifically, among accessions of *S. pimpinellifolium*, variation in days to wilting (a measure of drought tolerance) is strongly associated with differences in annual precipitation between coastal and highland regions (Nakazato et al., 2008), consistent with selection being imposed by this environmental axis. Interestingly, our findings at the intraspecific scale are also similar to previous inferences of important ecological drivers among wild tomato species. Distribution models have identified precipitation and temperature as the major determinants of differences in contemporary species ranges across the wild tomato clade (Nakazato et al., 2010). Moreover, these analyses indicate that precipitation seasonality in particular is important for determining the allopatric distributions of *S. pimpinellifolium* and its sister taxon *S. lycopersicum* var. *cerasiforme*.

In contrast to precipitation, the importance of vapor pressure as a selective agent within or among wild tomato species has not been evaluated, although vapor pressure's role in modulating plant-water relations has been well studied in domesticated tomato (Guichard et al., 2005; Zhang et al., 2017). Deficits in vapor pressure between the mesophyll and external leaf surface promotes transpiration (Zhang et al., 2017), and if not met with additional water uptake

from the soil, large differentials in vapor pressure will lead to reduced growth and desiccation. Our findings from RDA suggest that regional differences in vapor pressure are a strong selective force in *S. pimpinellifolium* (**Table 2**). The importance of *variation* in vapor pressure—and not a measure of annual or monthly mean values—may point to a role for specific physiological mechanisms which maximize fitness during acute fluctuations in evaporative demand (e.g., rapid stomatal closure responses, induction of root growth, or other strategies for increasing water use efficiency under temporary stress). This hypothesis is testable in the future with direct manipulative experiments across accessions that are predicted to differ at specific SNPs associated with this axis of the environment.

While variation in vapor pressure and precipitation were the most predictive of genomic variation across the range as a whole (**Table 2**), more specifically, regional environmental differences and our RDA analysis suggest that different factors are most influential in different regions of the species range (**Figure 3**; **Figure S3**). Genetic clusters we identify within *S. pimpinellifolium* are, in general, significantly diverged from each other for their environments (**Figure S3**; **Figure S4**). For example, coastal accessions (genetic clusters 1, 4, and partially 3) are exposed to higher levels of solar radiation compared to the rest of the range (**Figure S3**, panel 3); northern Peruvian accessions (cluster 2) experience highly seasonal precipitation (**Figure S3**; panel 2); and Ecuadorian accessions (cluster 5) experience high soil type diversity (i.e., all four soil types that found throughout the species range are also present in this region; **Figure S3**, panel 6). Together with our RDA results—which identified these and other variables as significantly predictive of SNP variation independent of spatial population structure—these patterns of environmental variation are consistent with regional differences in the primary agents of ecological selection. Unlike precipitation (see above), we are not aware of any studies that

have examined genetic variation for tolerance to these environmental factors (i.e., solar radiation, soil texture, and potential evapotranspiration) that would further support them as local selective agents. Further common garden manipulation experiments would be helpful to understand the exact role these forces have in shaping local climatic adaptation in *S. pimpinellifolium*. Nonetheless, these observations broadly mirror comparative findings from among wild tomatoes—that detect clear niche differentiation between species (Nakazato et al., 2010)—by uncovering similar niche variation intraspecifically at the regional level.

In addition to these findings, and just as with other genetic (Lasky et al., 2012, 2016) and community ecological studies using similar methods (Borcard et al., 2018), a large portion of variance remained unexplained. This is likely due to the influence of several factors that cannot be fully addressed in this type of experiment. First, although we included a large set of environmental variables in our analyses, many other unmeasured ecological forces could also be acting; most importantly, this includes biotic interactions that are likely only partially reflected in the abiotic factors considered here. Second, axes of population structure may not be fully explained by spatial dbMEM variables, potentially due to unmodeled geographic heterogeneity present in the Andes. Third, other evolutionary forces that maintain local allelic diversity (e.g., balancing selection) may weaken signals of SNP-environment associations. Lastly, as implemented here, both RDA and SEM only model linear associations between climate/space and SNPs (Borcard et al., 2018), and thus will not capture nonlinear statistical relationships if they exist. Interestingly, our GDM analysis—which does model nonlinear associations—explained significantly more total SNP variation than the other two methods (**Figure 4**), suggesting the presence of nonlinear SNP-environment relationships across the range of *S. pimpinellifolium*. Explicitly modeling and estimating the contribution of nonlinear terms to

patterns of SNP-environment associations may be crucial to understanding local adaptation in the context of multivariate environments, but such methods are currently limited (Rellstab et al., 2015).

Our SNP outlier analysis allowed us to map the location of genomic regions showing strong associations with major axes of the environment and identify candidate loci potentially involved in local adaptation (**Figure 5**). In contrast to traditional scans that treat each environmental variable independently (e.g., Fournier-Level et al., 2011; Hancock et al., 2011), our analysis considered how loci are associated with linear combinations of environmental gradients. This framework may be more appropriate for identifying ecologically relevant loci; rarely can a single environmental factor be considered the only contributor to selection. We identified 252 signals of putatively adaptive loci in *S. pimpinellifolium* using genomic scans based on RDA loadings. Of foremost interest are two regions containing known regulators of abiotic stress tolerance: *Solyc04g0511150*—sterol glucosyl transferase 4 (SGT4)—and *Solyc04g050080*—MYB transcription factor 73 (**Table 3**). SGT genes have been shown to have functional roles in abiotic stress tolerance in several species (Griebel & Zeier, 2010; Hugly et al., 1990; Kumar et al., 2015; Senthil-Kumar et al., 2013). Expression of SGT4 and its paralog SGT2 is rapidly induced upon exposure to cold and salt stress in domesticated tomato (Ramirez-Estrada et al., 2017). In *Arabidopsis thaliana* SGT knock-out mutants, plants show reduced tolerance to several abiotic stressors, including cold and salinity (Mishra et al., 2015). The other major candidate identified here, MYB 73, acts as a salt stress-specific transcription factor and modulates whole-plant responses to salinity in *A. thaliana* (Kim et al., 2013). Expression profiles of domesticated tomato under hormone-induced stress suggest a general role for MYB transcription factors in responding to abiotic cues (Li et al., 2016), although the specific function

of MYB 73 has not been evaluated in *Solanum*. While genotypic variance in salt-stress tolerance has been documented in *S. pimpinellifolium* (Rao et al., 2013)—suggesting that functional variation in salt-response loci may be prevalent—our analyses were not able to evaluate the contribution or association of this factor to genome-wide SNP variation, since fine-scale data on soil salinity in South America is not yet available. Nonetheless, these scans provide new information on the location of loci relevant for adaptive responses to abiotic stress, generating prime candidates for future functional investigation, as well as for breeding into domesticated lines.

In conclusion, all three multivariate methods employed here (RDA, SEM, and GDM) identified that climatic variation among the 140 wild *S. pimpinellifolium* accessions explained more genomic variation than geographic distance between accessions. Environmental variables describing temporal variation in precipitation and evaporative demand explained the most SNP variation overall, however we also observe significant geographical differences in other key climatic factors suggestive of intraspecific niche differentiation between geographic regions. Our outlier analysis has uncovered potential genomic targets of ecological selection, although further studies will be required to understand their exact genetic and phenotypic contributions to this pattern. To do so, for example, SNP-environment associations can be incorporated into breeding value prediction frameworks to test the functional roles of genomic regions showing strong environmental associations (Lasky et al., 2015; Yoder et al., 2012). Together, our results complement comparative findings from the wild tomato clade (Nakazato et al., 2010), indicating that spatially varying selection imposed by divergent abiotic habitats may be an important source of genetic variability in this species.

510    **ACKNOWLEDGEMENTS**

511    The authors thank the UC Davis Tomato Genetic Resource Center for providing access to the *S.*  
512    *pimpinellifolium* germplasm used in this study, the Indiana University Center for Genomics and  
513    Bioinformatics for library preparation and sequencing, and the Indiana University greenhouse  
514    staff. This research was supported by National Science Foundation award DEB-1136707 to  
515    LCM.

516



# REFERENCES

- Adrion, J.R., Hahn, M.W., and Cooper, B.S. (2015). Revisiting classic clines in *Drosophila melanogaster* in the age of genomics. *Trends in Genetics* 31(8): 434-444.
- Blanca, J., Cañizares, J., Cordero, L., Pascual, L., Diez, M.J., & Nuez, F. (2012). Variation Revealed by SNP Genotyping and Morphology Provides Insight into the Origin of the Tomato. *PLoS One* 7(10): e48198
- Blanca, J., Montero-Pau, J., Sauvage, C., Bauchet, G., Illa, E., Diez, M.J., Francis, D., Causse, M., van der Knaap, E., Cañizares, J. (2015). Genomic variation in tomato, from wild ancestors to contemporary breeding accessions. *BMC Genomics* 16: 257
- Bolarin, M., Fernandez, F., Cruz, V., and Cuartero, J. (1991). Salinity tolerance in four wild tomato species using vegetative yield-salinity response curves. *Journal of the American Society for Horticultural Science*, 116: 286–290.
- Borcard, D., Gillet, F., and Legendre, P. (2018). *Numerical Ecology with R*. Springer International, 2nd edition.
- Catchen, J., Hohenlohe, P., Bassham, S., Amores, A., and Cresko, W. (2013). Stacks: an analysis tool set for population genomics. *Molecular Ecology*, 22: 3124–3140.
- Chen, S., Zhou, Y., and Gu, J. (2018). fastp: an ultra-fast all-in-one FASTQ preprocessor. *Bioinformatics*, 34(17): i884–i890.
- Chitwood, D., Headland, L., Filiault, D., Kumar, R., Jimenez-Gomez, J., Schrager, A., Park, D., Peng, J., Sinha, N., and Maloof, J. (2012a). Native environment modulates leaf size and response to simulated foliar shade across wild tomato species. *PLoS One*, 7(1): e29570.
- Chitwood, D., Headland, L., Kumar, R., Peng, J., Maloof, J., and Sinha, N. (2012b). The developmental trajectory of leaflet morphology in wild tomato species. *Plant Physiology*, 158(3): 1230–1240.
- Cingolani, P., Platts, A., Wang, L., Coon, M., Nguyem, T., Wang, L., LandmS.J, Lu, X., and Ruden, D. (2012). A program for annotating and predicting the effects of single nucleotide polymorphisms, SnpEff: SNPs in the genome of *Drosophila melanogaster* strain w1118. *Fly*, 6(2): 1–13.
- Cuartero, J., Yeo, A., and Flowers, T. (1992). Selection of donors for salt-tolerance in tomato using physiological traits. *New Phytologist*, 121: 63–69.
- Des Marais, D. and Juenger, T. (2010). Pleiotropy, plasticity, and the evolution of plant abiotic stress tolerance. *Annals of the New York Academy of Sciences*, 1206: 56–79.
- Des Marais, D., McKay, J., Richards, J., Sen, S., Wayne, T., and Juenger, T. (2012). Physiological genomics of response to soil drying in diverse *Arabidopsis* accessions. *The Plant cell*, 24:893–914.
- Endler, J. (1977). *Geographic Variation, Speciation, and Clines*. Princeton University Press, Princeton, NJ.
- Endler, J. (1986). *Natural Selection in the Wild*. Princeton University Press, Princeton, NJ.
- Ferrier, S., Manion, G., Elith, J., and Richardson, K. (2007). Using generalized dissimilarity modelling to analyse and predict patterns of beta diversity in regional biodiversity assessment. *Diversity and Distributions*, 13(3): 252–264.
- Fick, S. E., & Hijmans, R. J. (2017). WorldClim 2: new 1-km spatial resolution climate surfaces for global land areas. *International Journal of Climatology*, 37(12), 4302-4315.
- Foolad, M. and Yin, G. (1997). Genetic potential for salt tolerance during germination in *Lycopersicon* species. *HortScience*, 32(2): 296–300.

- 562 Foolad, M. R. (2007). Current status of breeding tomatoes for salt and drought tolerance. In
- 563 *Advances in molecular breeding toward drought and salt tolerant crops* (pp. 669-700).
- 564 Springer, Dordrecht.
- 565 Forester, B., Lasky, J., Wagner, H., and Urban, D. (2018). Comparing methods for detecting
- 566 multilocus adaptation with multivariate genotype-environment associations. *Molecular*
- 567 *Ecology*, 27: 2215–2233.
- 568 Fournier-Level, A., Korte, A., Cooper, M., Nordborg, M., Schmitt, J., and Wilczek, A. (2011). A
- 569 map of local adaptation in *Arabidopsis thaliana*. *Science*, 334(6052): 86–89.
- 570 Griebel, T. & Zeier, J. (2010). A role for beta-sitosterol to stigmasterol conversion in plant-
- 571 pathogen interactions. *Plant Journal* 63(2): 254-268.
- 572 Guichard, S., Gary, C., Leonardi, C., and Bertin, N. (2005). Analysis of Growth and Water
- 573 Relations of Tomato Fruits in Relation to Air Vapor Pressure Deficit and Plant Fruit Load.
- 574 *Journal of Plant Growth Regulation*, 24(3): 201.
- 575 Hamann, A., Wang, T., Spittlehouse, D., and Murdock, T. (2013). A comprehensive, high-
- 576 resolution database of historical and projected climate surfaces for western North America.
- 577 *Bulletin of the American Meteorological Society*, 94: 1307–1309.
- 578 Hancock, A., Brachi, B., Faure, N., Horton, M., Jarymowycz, L., Sperone, G., Toomajian, C.,
- 579 Roux, F., and Bergelson, J. (2011). Adaptation to Climate Across the *Arabidopsis thaliana*
- 580 Genome. *Science*, 334(6052): 83–86.
- 581 Hugly, S., McCourt, P., Browse, J., Patterson, G.W., Somerville, C. (1990). A Chilling Sensitive
- 582 Mutant of *Arabidopsis* with Altered Steryl-Ester Metabolism. *Plant Physiology* 93(3):
- 583 1053-1062.
- 584 Jombart, T. and Ahmed, I. (2011). ADEGENET 1.3-1: new tools for the analysis of genome-wide
- 585 SNP data. *Bioinformatics*, 27(21): 3070–3071.
- 586 Kim, J., Nguyen, N., Jeong, C., Nguyen, N., Hong, S., and Lee, H. (2013). Loss of the R2R3 MYB,
- 587 AtMyb73, causes hyper-induction of the SOS1 and SOS3 genes in response to high salinity
- 588 in *Arabidopsis*. *Journal of Plant Physiology*, 170(16): 1461–1465.
- 589 Kissoudis, C., Sunarti, S., Van De Wiel, C., Visser, R.G.F., Van Der Linden, C.G., & Bai, Y.
- 590 (2016). Responses to combined abiotic and biotic stress in tomato are governed by stress
- 591 intensity and resistance mechanism. *Journal of Experimental Botany*, 67(17): 5119–5132.
- 592 Kooyers, N., Greenlee, A., Colicchio, J., Oh, M., and Blackman, B. (2015). Replicate altitudinal
- 593 clines reveal that evolutionary flexibility underlies adaptation to drought stress in annual
- 594 *Mimulus guttatus*. *New Phytologist*, 206(1): 152–165.
- 595 Kumar, M.S.S., Ali, K., Dahuja, A., and Tyagi, A. (2015). Role of phytosterols in drought stress
- 596 tolerance in rice. *Plant Physiology and Biochemistry* 96: 83-89.
- 597 Lasky, J., Des Marais, D., McKay, J., Richards, J., Juenger, T., and Keitt, T. (2012). Characterizing
- 598 genomic variation of *Arabidopsis thaliana*: the roles of geography and climate. *Molecular*
- 599 *Ecology*, 21: 5512–5529.
- 600 Lasky, J., Upadhyaya, H., Ramu, P., Deshhpande, S., Hash, C., Bonnette, J., Juenger, T., Hyma,
- 601 K., Acharya, C., Mitchell, S., Buckler, E., Brenton, Z., Kresovich, S., and Morris, G.
- 602 (2015). Genome-environment associations in sorghum landraces predict adaptive traits.
- 603 *Science Advances*, 1(6): e1400218.
- 604 Lee, C. and Mitchell-Olds, T. (2011). Quantifying effects of environmental and geographical
- 605 factors on patterns of genetic differentiation. *Molecular Ecology*, 20: 4631–4642.
- 606 Legendre, P. and Legendre, L. (1998). Numerical Ecology. Elsevier, Amsterdam, New York, 2nd
- 607 edition.

- Li, H. (2011). A statistical framework for SNP calling, mutation discovery, association mapping and population genetical parameter estimation from sequencing data. *Bioinformatics*, 27(21): 2987–2993.
- Li, H. and Durbin, R. (2009). Fast and accurate short read alignment with Burrows- Wheeler Transform. *Bioinformatics*, 25: 1754–1760.
- Li, Z., Peng, R., Tian, Y., Han, H., Xu, J., and Yao, Q. (2016). Genome-Wide Identification and Analysis of the MYB Transcription Factor Superfamily in *Solanum lycopersicum*. *Plant Cell and Physiology* 57(8): 1657-1677.
- Lin, Y., Liu, C., and Chen, K. (2019). Assessment of Genetic Differentiation and Linkage Disequilibrium in *Solanum pimpinellifolium* Using Genome-Wide High-Density SNP Markers. *G3* 9(5): 1497-1505.
- Manel, S., Poncet, B., Legendre, P., Gugerli, F., and Holderegger, R. (2010). Common factors drive adaptive genetic variation at different spatial scales in *Arabis alpina*. *Molecular Ecology*, 19: 3824–3835.
- Manion, G., Lisk, M., Ferrier, S., Nieto-Lugilde, D., Mokany, K., and Fitzpatrick, M. (2018). gdm: Generalized Dissimilarity Modeling. R package version 1.3.11.
- Mishra, M., Singh, G., Tiwari, S., Singh, R., Kumari, N., and Misra, P. (2015). Characterization of *Arabidopsis* sterol glycosyltransferase TTG15/UGT80B1 role during freeze and heat stress. *Plant Signaling & Behavior*, 10(12): e1075682.
- Nakazato, T., Bogonovich, M., and Moyle, L. (2008). Environmental factors predict adaptive phenotypic differentiation within and between two wild Andean tomatoes. *Evolution*, 62(4): 774– 792.
- Nakazato, T., Warren, D., and Moyle, L. (2010). Ecological and geographic modes of species divergence in wild tomatoes. *American Journal of Botany*, 97(4): 680–693.
- Oksanen, J., Blanchet, F., Kindt, R., Legendre, P., Minchin, P., O’Hara, R., Simpson, G., Solymos, P., Stevens, M., Wagnerr, H., and Oksanen, M. (2013). Package ‘vegan’. Community ecology package, version 2.9.
- Pedley, K. and Martin, G. (2003). Molecular basis of Pto-mediated resistance to bacterial speck disease in tomato. *Annual Review of Phytopathology*, 41: 215–243.
- Pitblado, R. and Kerr, E. (1979). A source of resistance to bacterial speck– *Pseudomonas* tomato. *Tomato Genetics Cooperative*, 29: 30.
- Raj, A., Stephen, M., and Pritchard, J. (2014). fastSTRUCTURE: Variational Inference of Population Structure in Large SNP Data Sets. *Genetics*, 197: 573–589.
- Rao, E.S., Kadirvel, P., Symonds, R.C., and Ebert, A.W. (2013). Relationship between survival and yield related traits in *Solanum pimpinellifolium* under salt stress. *Euphytica* 190(2): 215-228.
- Ramirez-Estrada, K., Castillo, N., Lara, J., Arro, M., Boronat, A., Ferrer, A., and Altabella, T. (2017). Tomato UDP-Glucose Sterol Glycosyltransferases: A Family of Developmental and Stress Regulated Genes that Encode Cytosolic and Membrane-Associated Forms of the Enzyme. *Frontiers in Plant Science*, 8, 984.
- Razali, R., Bougouffa, S., Morton, M., Lightfoot, D., Alam, I., Essack, M., Arold, S., Kamau, A., Schmockel, S., Pailles, Y., Shahid, M., Michell, C., Salim, A., Ho, Y., Tester, M., Bajic, V., and Negrao, S. (2018). The Genome Sequence of the Wild Tomato *Solanum pimpinellifolium* Provides Insights into Salinity Tolerance. *Frontiers in Plant Science*, 9, 1402.

- 653 Rellstab, C., Gugerli, F., Eckert, A.J., Hancock, A.M., and Holderegger, R. (2015). A practical  
654 guide to environmental association analysis in landscape genomics. *Molecular Ecology*  
655 24(17): 4348-4370.
- 656 Rick, C., Fobes, J., and Holle, M. (1977). Genetic variation in *Lycopersicon pimpinelli-* folium:  
657 evidence of evolutionary change in mating systems. *Plant Systematics and Evolution*, 127:  
658 139–170.
- 659 Rosseel, Y. (2012). lavaan: An R Package for Structural Equation Modeling. *Statistical Software*,  
660 48(2): 1–36.
- 661 Salathe, R. and Schmid-Hempel, P. (2011). The genotypic structure of a multi-host bumblebee  
662 parasite suggests a role for ecological niche overlap. *PLoS One*, 6: e22054.
- 663 Senthil-Kumar, M., Wang, K., and Mysore, K.S. (2013). AtCYP710A1 gene-mediated  
664 stigmasterol production plays a role in imparting temperature stress tolerance in  
665 *Arabidopsis thaliana*. *Plant Signaling and Behavior* 8: e23142.
- 666 Sork, V., Davis, F., Westfall, R., Flint, A., Ikegami, M., Wang, H., and Grivet, D. (2010). Gene  
667 movement and genetic association with regional climate gradients in California valley oak  
668 (*Quercus lobata* Nee) in the face of climate change. *Molecular Ecology*, 19: 3806–3823.
- 669 Tanksley, S. (2004). The genetic, developmental, and molecular bases of fruit size and shape  
670 variation in tomato. *The Plant cell*, 16: 181–189.
- 671 Tanksley, S., Grandillo, S., Fulton, T., Zamir, D., Eshed, Y., Petiard, V., Lopez, J., and Beck-  
672 Bunn, T. (1996). Advanced backcross QTL analysis in a cross between an elite processing  
673 line of tomato and its wild relative *L. pimpinellifolium*. *Theoretical and Applied Genetics*,  
674 92: 213–224.
- 675 Tomato Genome Consortium (2012). The tomato genome sequence provides insights into fleshy  
676 fruit evolution. *Nature*, 485: 635–641.
- 677 van den Wollenberg, A. (1977). Redundancy analysis: an alternative for canonical correlation  
678 analysis. *Psychometrika*, 42: 207–219.
- 679 Vucetich, J.A. and Walte, T.A. (2003). Spatial patterns of demography and genetic processes  
680 across the species' range: Null hypotheses for landscape conservation genetics.  
681 *Conservation Genetics* 4(5): 639-645.
- 682 Wang, I., Glor, R., and Losos, J. (2013). Quantifying the roles of ecology and geography in spatial  
683 genetic divergence. *Ecology Letters*, 16: 175–182.
- 684 Wiens, J. (1989). Spatial Scaling in Ecology. *Functional Ecology*, 3(4): 385–397.
- 685 Wright, S. (1943). Isolation by distance. *Genetics*, 28(2): 114–138.
- 686 Yoder, J., Stanton-Geddes, J., Zhou, P., Briskine, R., Young, N., and Tiffin, P. (2012). Genomic  
687 signature of adaptation to climate in *Medicago truncatula*. *Genetics*, 196: 1263–1275.
- 688 Zhang, D., Du, Q., Zhang, Z., Jiao, X., Song, X., and Li, J. (2017). Vapour pressure deficit control  
689 in relation to water transport and water productivity in greenhouse tomato production  
690 during summer. *Scientific Reports*, 7: 43461.
- 691 Zomer, R., Trabucco, A., Bossio, D., van Straaten, O., and Verchot, L. (2008). Climate Change  
692 Mitigation: A Spatial Analysis of Global Land Suitability for Clean Development  
693 Mechanism Afforestation and Reforestation. *Agriculture, Ecosystems, and Environment*,  
694 126: 67–80.
- 695 Zuriaga, E., Blanca, J.M., Cordero, L., Sifres, A., Blas-Cerdan, W.G., Morales, R., and Nuez, F.  
696 (2009). Genetic and bioclimatic variation in *Solanum pimpinellifolium*. *Genetic Resources*  
697 *and Crop Evolution* 56: 39-51.

699     **DATA ACCESSIBILITY**

700     Demultiplexed raw read (FASTQ) files from all 140 accessions are deposited in the NCBI SRA  
701     (BioProject: PRJNA561198). All NGS pipeline and data analysis scripts as well as aggregated  
702     environmental data are available on GitHub at <https://github.com/gibsonmatt/pimpGEA>.

703

704 **AUTHOR CONTRIBUTIONS**

705 MJSG and LCM designed the experiments; MJSG performed the greenhouse and molecular

706 work and conducted the bioinformatic analyses; MJSG and LCM wrote the manuscript.

707



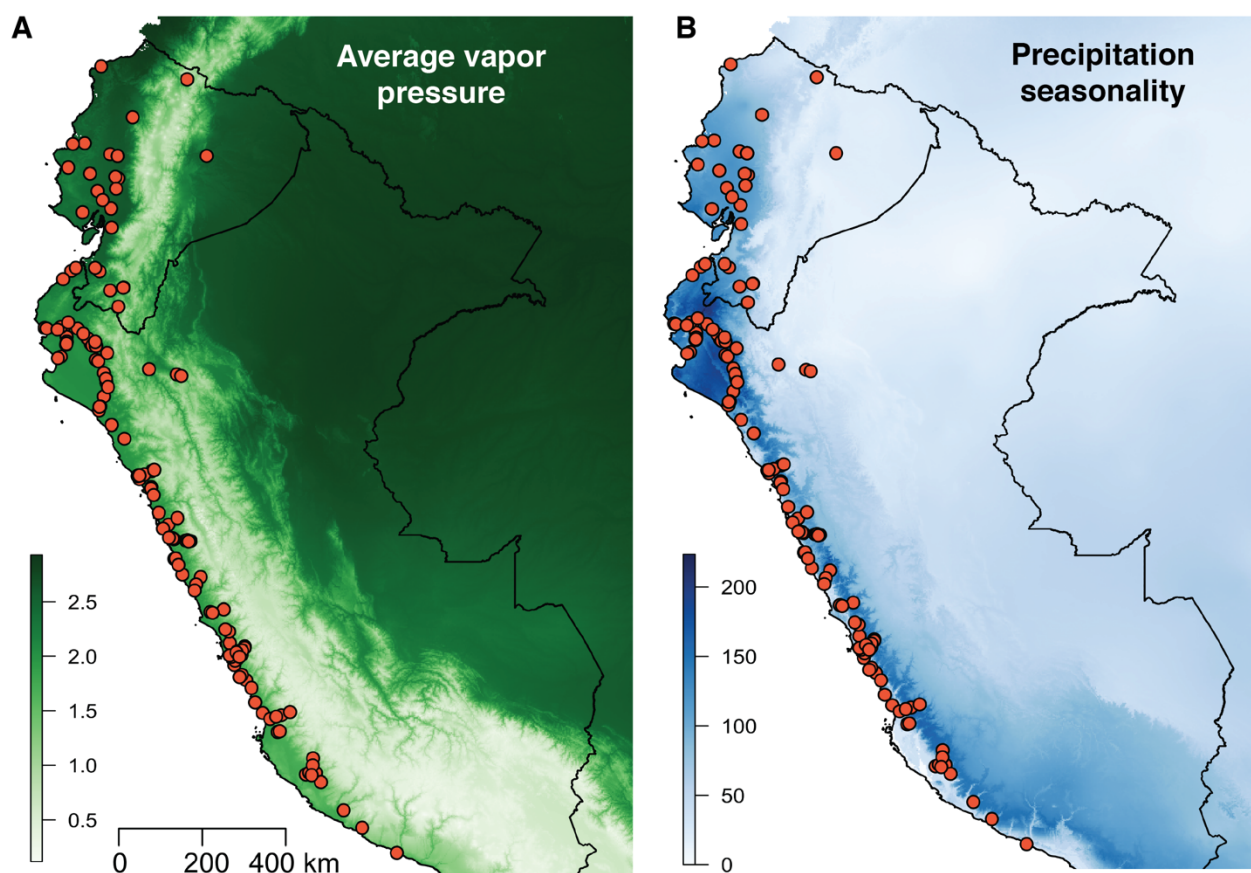

**Figure 1:** 140 South American accessions included in our analyses. Ecuador (North) and Peru (South) are outlined in black. (A) Accession collection sites overlain on average vapor pressure (in units of kPa). Variation in vapor pressure contributed the most to explaining patterns of spatial genetic variation using RDA. (B) Accessions overlain on precipitation seasonality (coefficient of monthly variation).

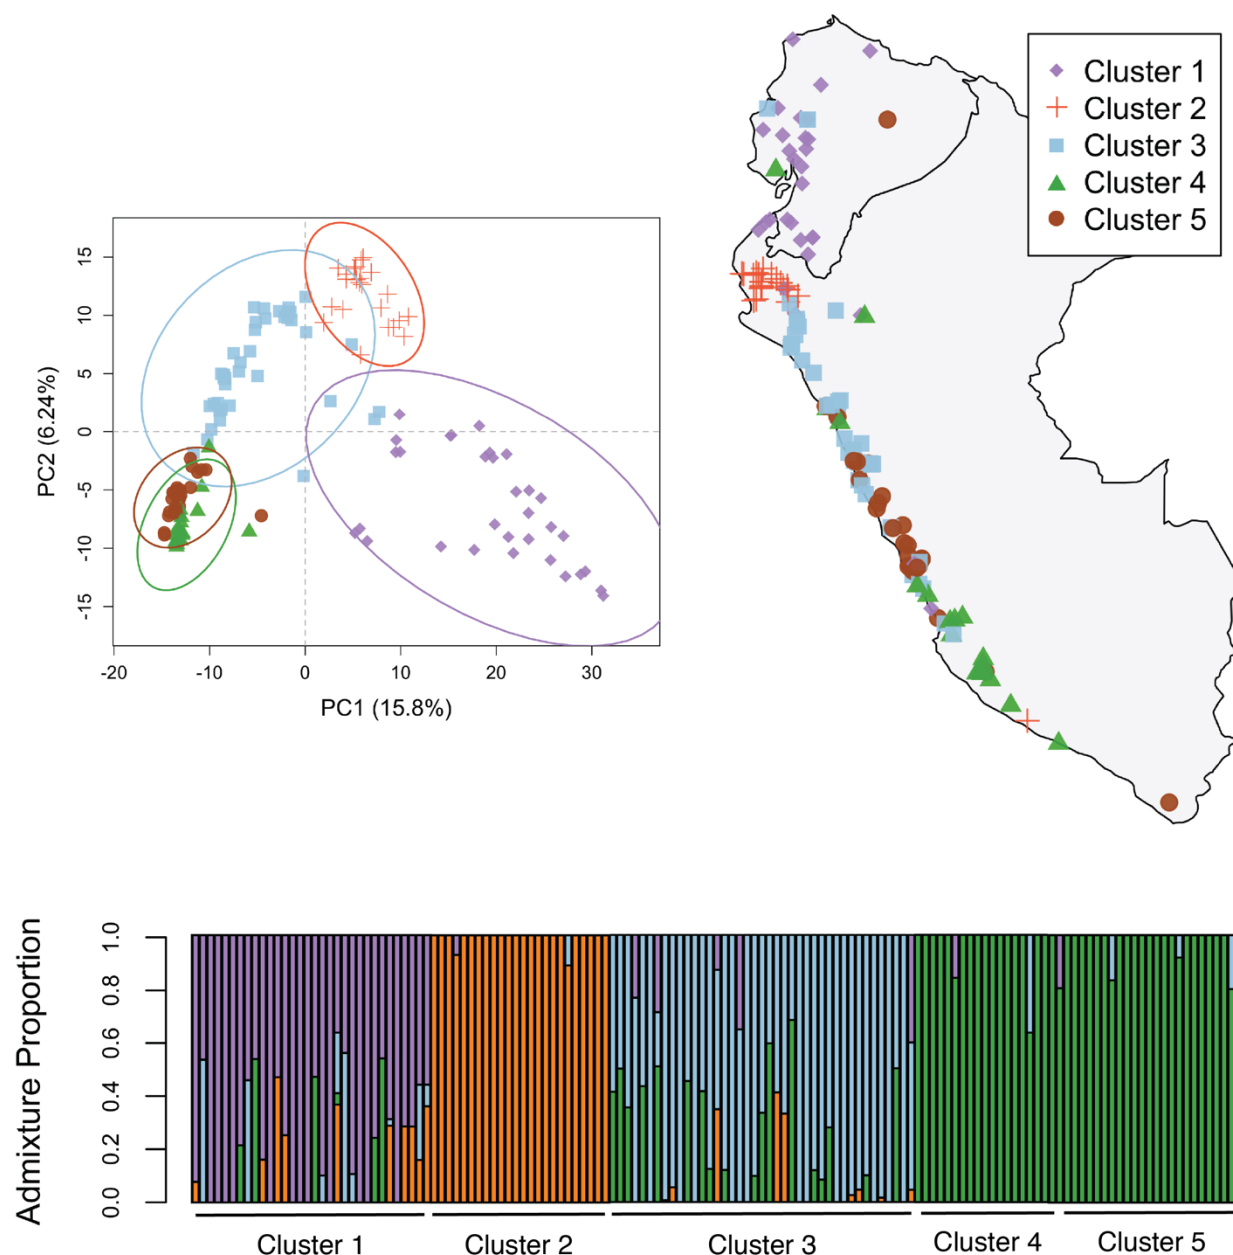

**Figure 2:** Genetic population structure in *S. pimpinellifolium* as revealed by principle components (PC) analysis (top panels) and fastStructure (bottom panel). (A) First two PC axes. Points are colored by membership in the five K-means clusters. (B) Accession collection sites colored by K-mean cluster membership. (B) Admixture proportions of all accessions identified with *fastStructure*, ordered by clusters identified in K-means to show correspondence between the methods.



**Table 1:** List of dbMEM variables and their contribution to SNP variation as determined by forward variable selection with RDA. Cumulatively more variation was explained by variables describing fine-scale geographic structure (0.070) than large-scale structure (0.054). Significance in forward selection was determined by permutation tests.

| Variable | Class | R <sup>2</sup> | F     | P-val |
|----------|-------|----------------|-------|-------|
| MEM2     | Broad | 0.017          | 2.439 | 0.001 |
| MEM8     | Fine  | 0.015          | 2.122 | 0.001 |
| MEM4     | Broad | 0.015          | 2.104 | 0.001 |
| MEM6     | Fine  | 0.014          | 1.980 | 0.002 |
| MEM1     | Broad | 0.013          | 1.888 | 0.001 |
| MEM5     | Fine  | 0.013          | 1.822 | 0.003 |
| MEM17    | Fine  | 0.010          | 1.464 | 0.02  |
| MEM9     | Fine  | 0.009          | 1.386 | 0.038 |
| MEM7     | Fine  | 0.009          | 1.373 | 0.037 |
| MEM3     | Broad | 0.009          | 1.328 | 0.041 |

**Table 2:** Top environmental variables and their contribution to spatial SNP variation as determined by forward variable selection with RDA. Results from both the full RDA model selection (not conditioned on space) and partial RDA model selection (conditioned on space) are reported.

| RDA (not constrained on space)  |                           | RDA (constrained on space) |                           |
|---------------------------------|---------------------------|----------------------------|---------------------------|
| Variable                        | Contribution to RDA model | Variable                   | Contribution to RDA model |
| Degree days above 18C           | 13.60                     | CV vapor pressure          | 2.76                      |
| Annual max solar radiation      | 13.45                     | Prec. seasonality          | 2.43                      |
| Annual average wind speed       | 13.45                     | Soil texture               | 2.25                      |
| Isothermality                   | 13.44                     | Annual max solar radiation | 2.23                      |
| Annual max wind speed           | 13.33                     | Max potential evapotransp. | 2.16                      |
| CV vapor pressure               | 13.31                     | Min potential evapotransp. | 1.64                      |
| Temperature seasonality         | 13.17                     |                            |                           |
| Extreme min temperature (30 yr) | 13.10                     |                            |                           |
| Max soil water stress           | 11.55                     |                            |                           |
| Climatic moisture deficit       | 10.63                     |                            |                           |
| Annual temperature range        | 9.44                      |                            |                           |
| Mean diurnal range              | 8.02                      |                            |                           |
| Max potential evapotransp.      | 6.05                      |                            |                           |
| CV wind speed                   | 3.21                      |                            |                           |

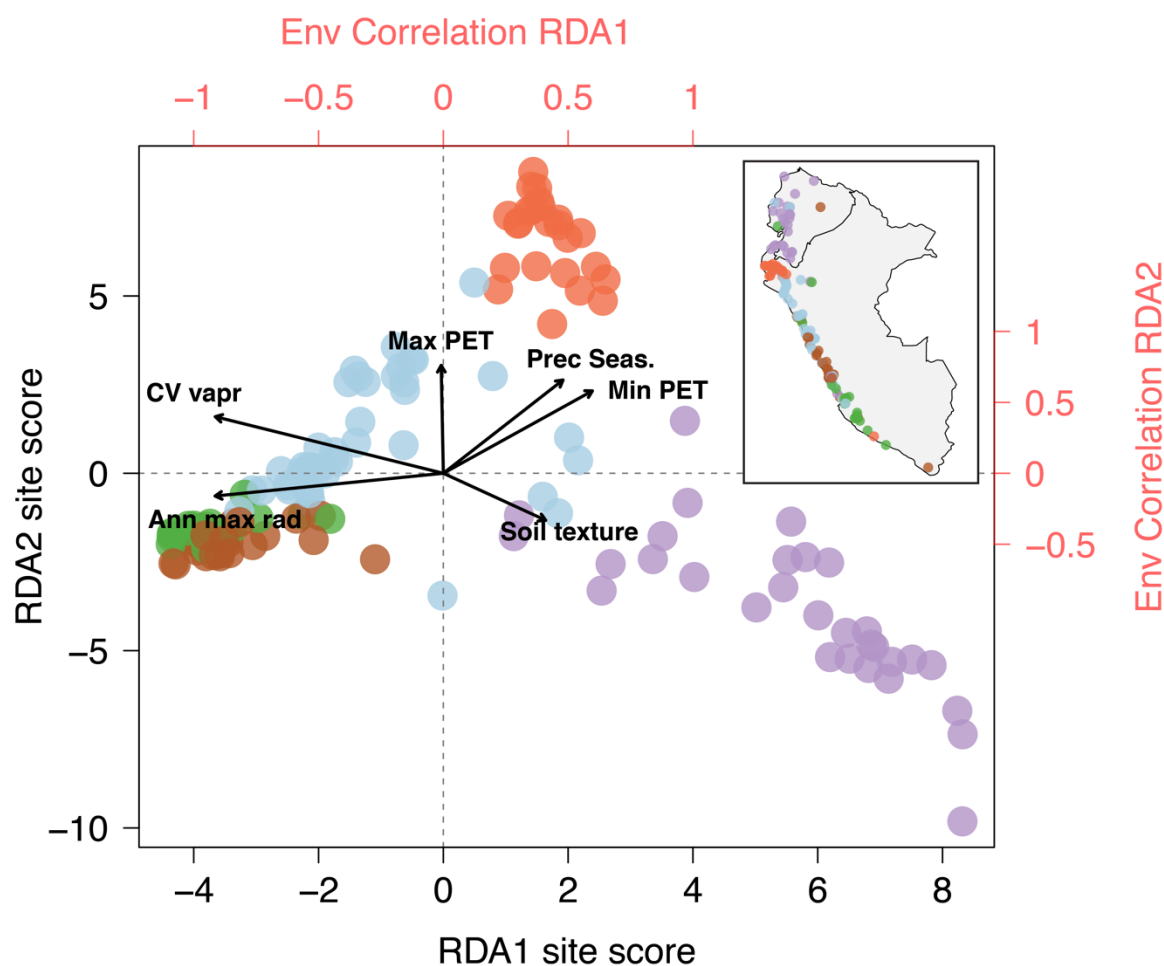

**Figure 3:** Biplot of site (accession) scores for the first two RDA axes, constraining on space with dbMEMs. Points are colored to correspond with genetic clusters identified in PCA (shown in inset, from Figure 2). Top and right axes (red) show the correlation of each environmental predictor with RDA axes 1 and 2, respectively.

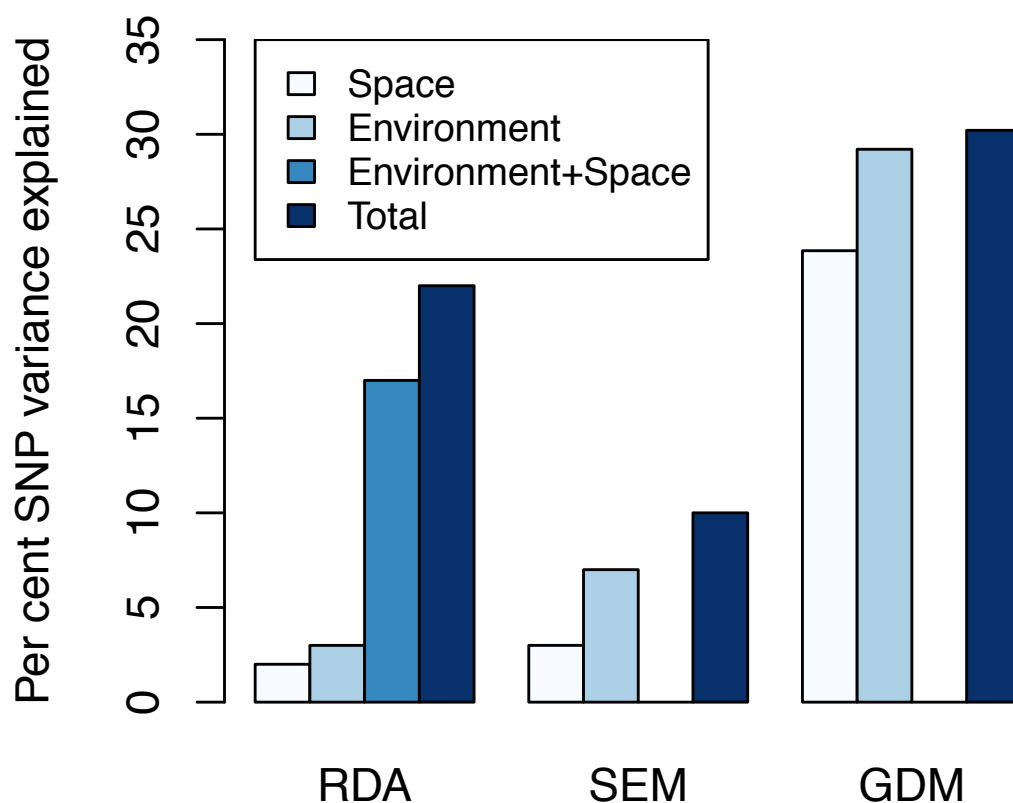

**Figure 4:** Summary of the three variance partitioning methods. Note that SEM and GDM are unable to quantify the independent contribution of environment + space.

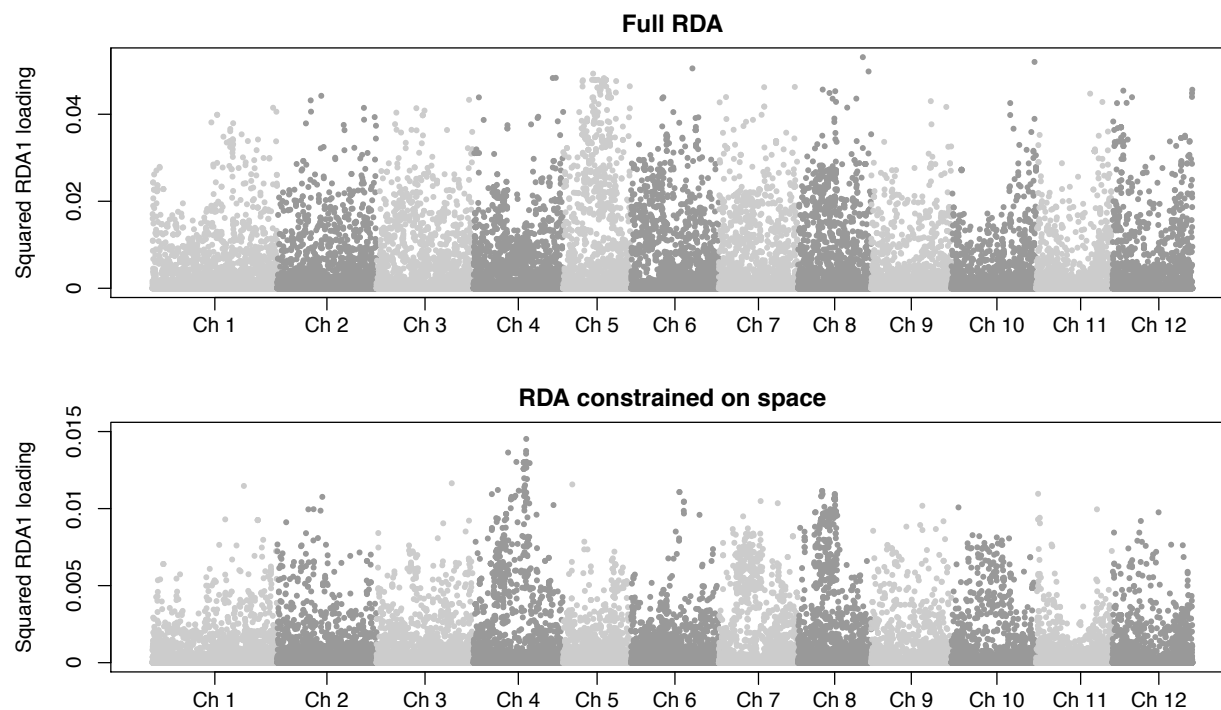

**Figure 5:** Values of squared RDA1 SNP loadings throughout the genome. Top panel: SNP loadings on the first RDA axis of raw SNP variation. Bottom panel: SNP loadings on the first RDA axis accounting for spatial structure among accessions. Note the change in y-axis scale between the two panels.

**Table 3:** Annotated gene models located within 10kb of the top 15 outlier SNPs along the first RDA axis, after accounting for spatial structure. We also do not report SNPs within 10kb of SNPs with higher loadings. The full list of outlier SNPs and their annotations can be found in table S6.

| Chr. | SNP position | Locus          | SNP Category | Distance from Locus (bp) | RDA 1 Loading | Locus Description                       |
|------|--------------|----------------|--------------|--------------------------|---------------|-----------------------------------------|
| 4    | 46907724     | Solyc04g050390 | Intergenic   | 30                       | 0.015         | 60S ribosomal subunit                   |
| 4    | 37812488     | Solyc04g047830 | Intergenic   | 4389                     | 0.013         | DNA glycosylase                         |
| 4    | 44823446     | Solyc04g049930 | Missense     | 0                        | 0.013         | Unknown protein                         |
| 4    | 49678371     | Solyc04g051150 | Intron       | 0                        | 0.013         | Sterol glucosyl transferase 4 (SGT4)    |
| 3    | 66381751     | Solyc03g115060 | Intergenic   | 66                       | 0.012         | Exocyst complex component 7             |
| 5    | 3609439      | Solyc05g009440 | Intron       | 0                        | 0.012         | Nuclease S1                             |
| 1    | 88554548     | Solyc01g098080 | Intron       | 0                        | 0.011         | BY-2 kinesin-like protein 5             |
| 4    | 45372222     | Solyc04g050080 | Missense     | 0                        | 0.011         | MYB transcription factor 73             |
| 8    | 26166364     | Solyc08g041710 | Intron       | 0                        | 0.011         | Transmembrane protein                   |
| 6    | 39445574     | Solyc06g062360 | Intron       | 0                        | 0.011         | Syntaxin-like protein                   |
| 11   | 417966       | Solyc11g005560 | Intergenic   | 658                      | 0.011         | Cellulose synthase                      |
| 8    | 27570643     | Solyc08g023500 | Intron       | 0                        | 0.011         | Metallohydrolase/oxioreductase          |
| 4    | 5709089      | Solyc04g015490 | 3' UTR       | 0                        | 0.011         | Magnesium chelatase subunit D           |
| 4    | 45599110     | Solyc04g050150 | Intron       | 0                        | 0.011         | RNA helicase DEAH-Box 13                |
| 8    | 23509033     | Solyc08g042140 | Intron       | 0                        | 0.011         | Translation initiation factor 3 subunit |
